CORRECTION

# Correction: Correction: Induction of TLR-2 and TLR-5 Expression by *Helicobacter pylori* Switches *cagPAI*-Dependent Signalling Leading to the Secretion of IL-8 and TNF- $\alpha$

The *PLOS ONE* Staff

There is an error in the Correction published on October 23, 2015. The correction should refer to Panels B and D of [Fig 3](#), not Panel A of Fig 6. The publisher apologizes for the error. The correct text is:

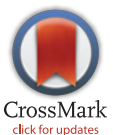

 OPEN ACCESS

**Citation:** The *PLOS ONE* Staff (2015) Correction: Correction: Induction of TLR-2 and TLR-5 Expression by *Helicobacter pylori* Switches *cagPAI*-Dependent Signalling Leading to the Secretion of IL-8 and TNF- $\alpha$ . *PLoS ONE* 10(12): e0144365. doi:10.1371/journal.pone.0144365

**Published:** December 2, 2015

**Copyright:** © 2015 The PLOS ONE Staff. This is an open access article distributed under the terms of the [Creative Commons Attribution License](#), which permits unrestricted use, distribution, and reproduction in any medium, provided the original author and source are credited.

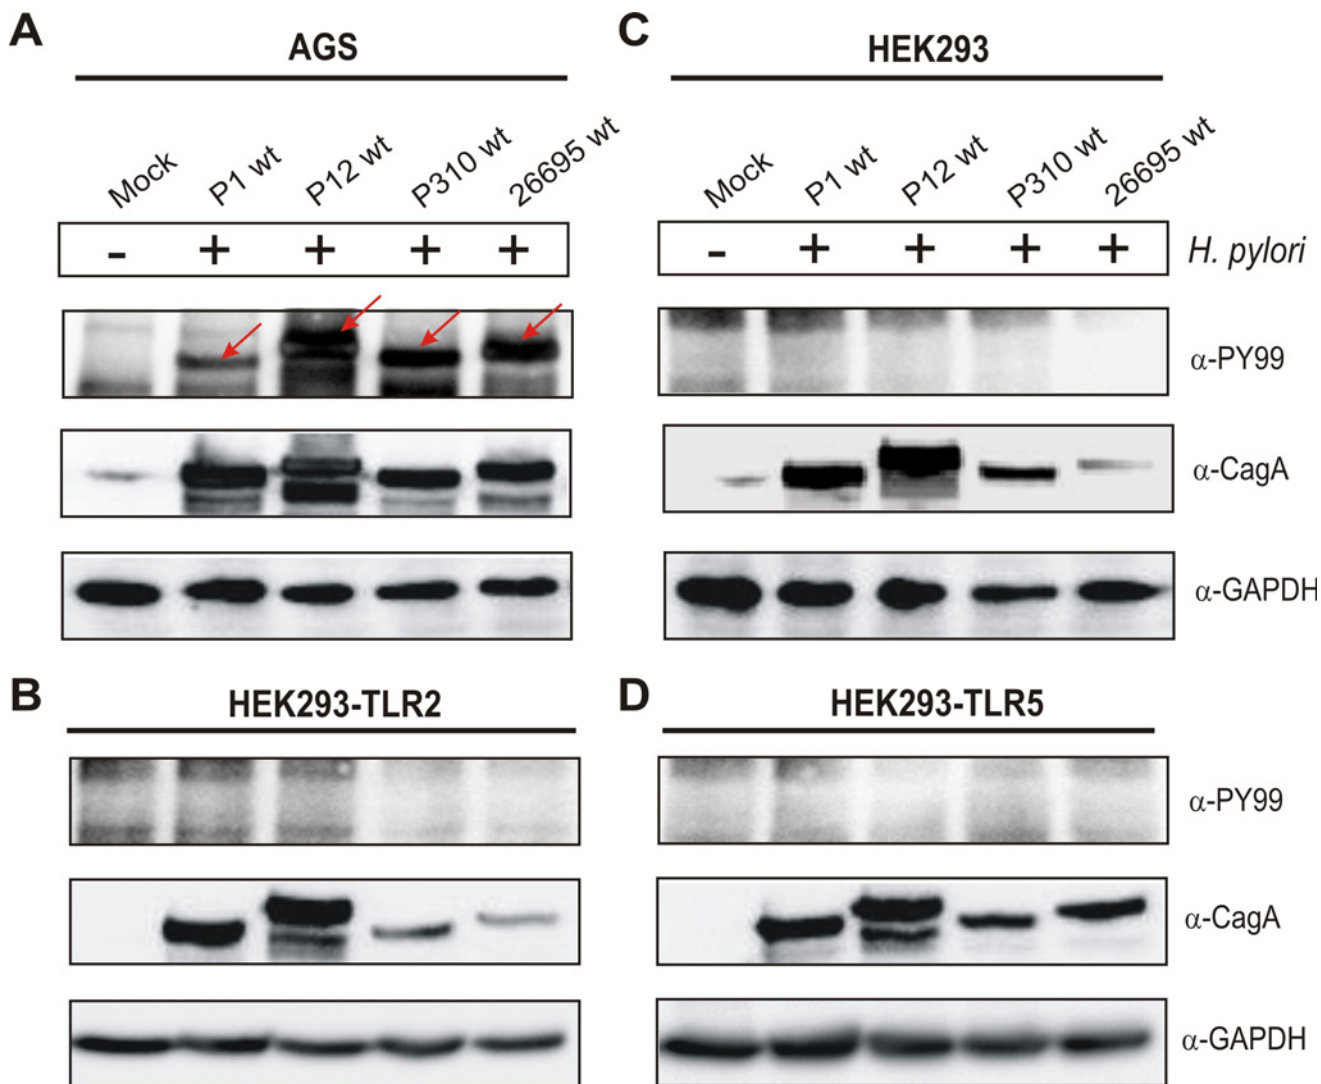

**Fig 3. CagA injection by *H. pylori* cannot be achieved in infected HEK293 cell lines but in AGS gastric epithelial cells.** Western blot analysis of (A) AGS, (B) HEK293-TLR2, (C) HEK293 and (D) HEK293-TLR5 cells infected with *H. pylori* wild-type strains P1, P12, P310 or 26695 for 6 hours. Phosphorylation of injected CagA was monitored using phosphotyrosine  $\alpha$ -PY-99 and  $\alpha$ -CagA antibodies. Red arrows indicate the position of phosphorylated CagA on the blot. Western blots for the house keeping gene GAPDH served as loading control.

doi:10.1371/journal.pone.0144365.g001

In Panels B and D of Fig 3, the blot images for the GAPDH lanes in the HEK293-TLR2 and HEK293-TLR5 panels were erroneously duplicated. Please see Figs 10 and 11 to view the raw blots for the GAPDH lanes.

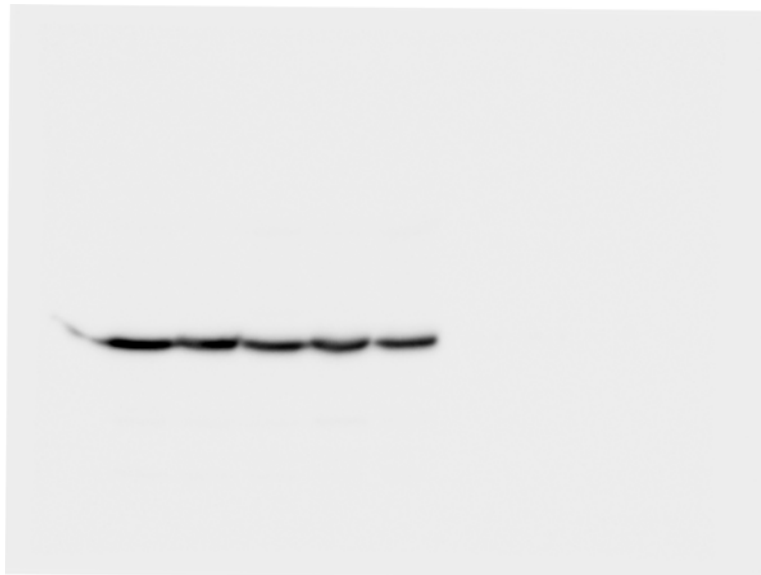

**Fig 10. Raw blot for HEK293-TLR2 GAPDH**

doi:10.1371/journal.pone.0144365.g002

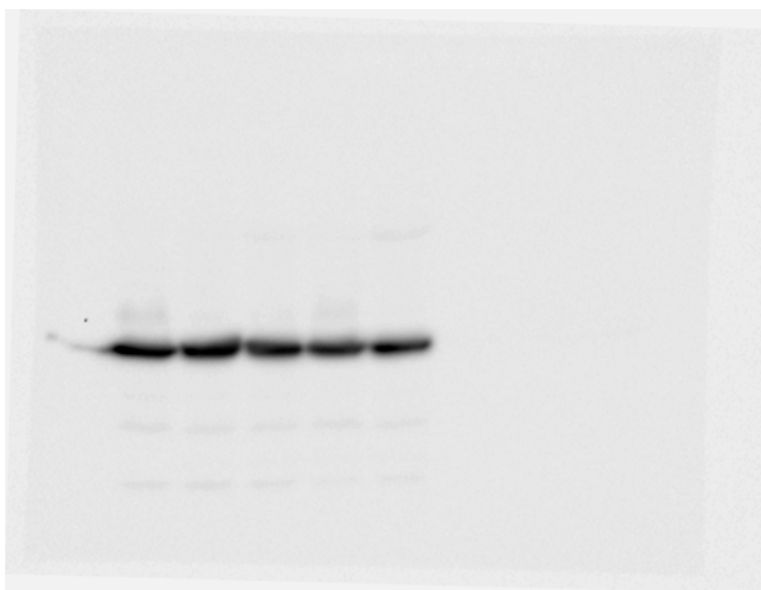

**Fig 11. Raw blot for HEK293-TLR5 GAPDH**

doi:10.1371/journal.pone.0144365.g003

## Reference

1. Kumar Pachathundikandi S, Brandt S, Madassery J, Backert S (2011) Induction of TLR-2 and TLR-5 Expression by *Helicobacter pylori* Switches *cagPAI*-Dependent Signalling Leading to the Secretion of IL-8 and TNF- $\alpha$ . PLoS ONE 6(5): e19614. doi: [10.1371/journal.pone.0019614](https://doi.org/10.1371/journal.pone.0019614) PMID: [21573018](https://pubmed.ncbi.nlm.nih.gov/21573018/)
2. Kumar Pachathundikandi S, Brandt S, Madassery J, Backert S (2015) Correction: Induction of TLR-2 and TLR-5 Expression by *Helicobacter pylori* Switches *cagPAI*-Dependent Signalling Leading to the Secretion of IL-8 and TNF- $\alpha$ . PLoS ONE 10(10): e0141721. doi: [10.1371/journal.pone.0141721](https://doi.org/10.1371/journal.pone.0141721) PMID: [26496251](https://pubmed.ncbi.nlm.nih.gov/26496251/)
